# Supplementary material for: Suppression of Dendritic Cell-Derived IL-12 by Endogenous Glucocorticoids Is Protective in LPS-Induced Sepsis
Source: PLoS Biol. 2015 Oct 6;13(10):e1002269. doi: 10.1371/journal.pbio.1002269 (PMC4595142; doi:10.1371/journal.pbio.1002269)
Supplement: S1 Data — (XLSX) [file pbio.1002269.s001.xlsx]

## Sheet: Fig1C
serum Cort during LPS challenge
	WT											GRCD11c-Cre
0	77	104	28	134							4	26	163								65
1									386	519	455	612	490	299
3	413	664	425	557					461	727	763	341	675	545	515				870	704	808
6	557	885	319	298	411	506	596					357	501	706	850
12	548	230	596	627	435				821	300	442	175	357	378	476				623	754	627
24	169	272	495	236								205	425
44	98	222	208	129								335	423	127	395

## Sheet: Fig1D
Body Temperature of LPS challenged mice
LPS 2.5
	WT 2.5									KO 2.5
0	31.3	30.2	32	34.1	34.7	34.5	34.5	34.1		32	34.6	32.3	33.6	33.2	34.2
2	33	33.6	32.3	33.3	33.9					32.5	32.7	32	32.5
4	32.2	32.1	32		32.1					32.1	32.9	32.3	31.6
6	32.3	32.9	32.1	33	31.8					31.6	32.6	32	32.6
8	30.6	32.2	31.6	32.7	31.2					31	30.7	31	30.6
10	29.8	32	32.2	31.7	31.1					29.1	30.9	30	31.2
12	29.6	31.6	32.2	32	31.5					30.4	30.6	30.2	30.4
15	29.5	31.6	32.3	32	32.2					30.1	30.9	29.9	30.3
24	31.3	33.2	33.2	33	33.1					32.2	32.8	31.7	32.3
LPS 5
	WT 5									KO 5
0	31.3	30.2	32	34.1	34.7	34.5	34.5	34.1		32	34.6	32.3	33.6	33.2	34.2
2	32.8	32.6	33.1	31.9	32.8					33.3	32.9	31.7	31.5	32.5
4	32.5	32.6	33	30.4	33					33.2	32.5	31.6	30.6	32.5
6	32.2	31.6	31.8	31.7	33					32.1	32.1	31.3	30.3	31.6
8	31.9	32.1	31.5	32.6	32.6					32.1	31	30.8	29.7	31.1
10	31	30.8	30.9	31.2	31.8					30.5	30.3	30.1	28.2	30.4
12	31.6	31.1	31.6	31.6	32					30.1	30.4	31	28.7	29.7
15	32.1	31.8	31.3	31.9	32.4					30.7	30.6	29.5	30	30.8
24	33.2	32.6	33.2	32.5	32.8					31.7	31.2	31.8	29.2	31.2
LPS 10
	WT 10									KO 10
0	31.3	30.2	32	34.1	34.7	34.5	34.5			32	34.6	32.3	33.6	33.2
2	33.1	33.3	32.6	32.2	32.1	32.6	32.8			32	31.8	31.1	32.3	31.3
4	32.8	32.6	32.1	31.3	32.6	32.4	32.2			32.2	30.2	29.8	31.1	30.5
6	31.1	32.8	30	29.5	30.7	30.5	31.2			31	26.8	28	28.8	28.9
8	30.6	32.8	28.8	29.1	29.5	30.8	31.1			30.4	28.8	26.3	27.2	27.6
10	29.6	30.5	28.5	28.8	28.2	28.7	29.7			28.7	27.3	24.7	25.4	26
12	30.1	31.1	29.5	29.6	28.6	29	30.5			29.3	26.9	24.8	25.6	25.8
15	30.3	31.7	29.7	30	28.1	29.3	30.3			29.3	25	25.4	26.1	27.3
24	30.5	33	30.8	31.3	30.1	29	32.6			29.7	25	26.1	26.4	26.5

## Sheet: Fig2A
TNFa kinetics
	WT								GRCD11c KO
0	0		0						0	0
1	1688.34	1862.62	1220.89						1828.73	1500.94	1297
3	245.18	106.54	519.01	797.76	688.16	755.2	905.96		1154.01	1334.73	1501.67	1827.8	1178.88	959.82
6	91.08	64.34	181.39	204.41					323.41	1097.55	401.45	553.55
12	12.67		90.72	117.77	16.92				65.77	81.15	84.21	289.62	191.4	156.1	241.21

## Sheet: Fig2B
IL1b kinetics
	WT							GRCD11c KO
0	0							0
1	0	0						37.33	13.83	0
3	143.66	14.57	114.4	149.51				222.3	350.14	373.34
6	68.18	27.76	63.76	75.83				143.66	701.18	136.98	220.87
12	18.46	10.38	15.53	34.28				68.25	54.01	49.76	219.31

## Sheet: Fig2C
IFNa Kinetics
	WT								GRCD11c KO
0	0		0						0	0
1	11.24	43.76	20.65						37.05	19.35	19.77
3	79.44	14.87	78.72	118.45	30.15	83.36	47.28		260.86	239.08	229.3	546.51		201.53
6	0	18.73	11.52						32.4	50.78	34.48	191.42
12	12.25	10.49	12.38	11.58	12.28				25.63	22.8	33.13	24.26	17.85	30.26	17.2

## Sheet: Fig2E
IL-12 kinetics
	WT							GRCD11c KO
0	0							0
1	2.76	0						0
3	0	28.39	20.87	16.82				45.85	46.69	50.84
6	21.06	27.32	0	0				28.51	69.36	100.53	72.48
12	0	6.06	10.65					0	18.91	50.01	36.04		28.2

## Sheet: Fig2F
IFNg kinetics
	WT								GRCD11c KO
0	0								0
1	20.96	34.33	22.58	23.33	50.24				0
3	282.39	143.22	636.4	443.05	311.99	599.71	277.19		2370.78	2687.38	1233.46
6	3726.59	1465.37							11261	17240.4
12	344.38	106.46	367.96	304.64					3201.14	7764	11041.1	36536.7	19529.4	16342.8

## Sheet: Fig2H
% NK at 12 hr
	WT					GRCD11c KO
	2.55	7.93	3.53			25	11.4	9.13
IFNg MFI	WT					GRCD11c KO
	2565	2617	2065			5961	5849	5100

## Sheet: Fig2I
IL-12 neutralization end point body temperature
isotype ctrl	anti-IL-12 100ug	anti-IL-12 250 ug	WT anti-IL-12 250 ug
25	30.3	31.8	31.9
26.2	29.3	31	30.7
27.4	27.2	31.5	30.7
26.4	28	29.7
26.6	29.8
27.4	27.3
25.2

## Sheet: FIg4D
%CD8+DC in WT and KO
WT	GRCD11c-cre
8.69	16.2
12.7
22.6	22.7
18.1	31.4
10.2	17.3
18	29.3
9.92	15.3
5.58	14.5
5.27	12.3
17.2	27.7
21.2
13	23.8

[truncated: 5 more sheets: Fig4E, FIg5B, FIg5C, Fig5D, Fig5E]
